# Supplementary material for: In situ K2S activated electrospun carbon nanofibers with hierarchical meso/microporous structures for supercapacitors
Source: Royal Society of Chemistry journal article supplement (doi:10.1039/c9ra06847c), 2019-01-01
Supplement: c9ra06847c1.pdf [file c9ra06847c1.pdf]

## Supporting Information

# In-situ K<sub>2</sub>S Activated Electrospun Carbon Nanofibers with Hierarchical Meso/Microporous Structures for Supercapacitors

*Hua Liu,<sup>\*†</sup> Wei-Guo Song<sup>‡</sup> and Ai-Hua Xing<sup>\*†</sup>*

<sup>†</sup> National Institute of Clean-and-Low-Carbon Energy, Beijing 102211, People's

Republic of China

<sup>‡</sup> Beijing National Laboratory for Molecular Sciences (BNLMS) & Key Laboratory of

Molecular Nanostructure and Nanotechnology, Institute of Chemistry, Chinese

Academy of Sciences, Beijing, 100190, People's Republic of China

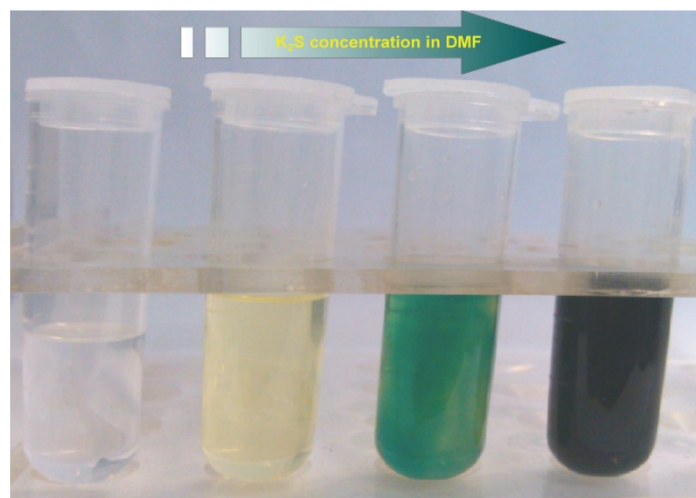

Fig. S1 Digital photograph of K<sub>2</sub>S dissolving in DMF.

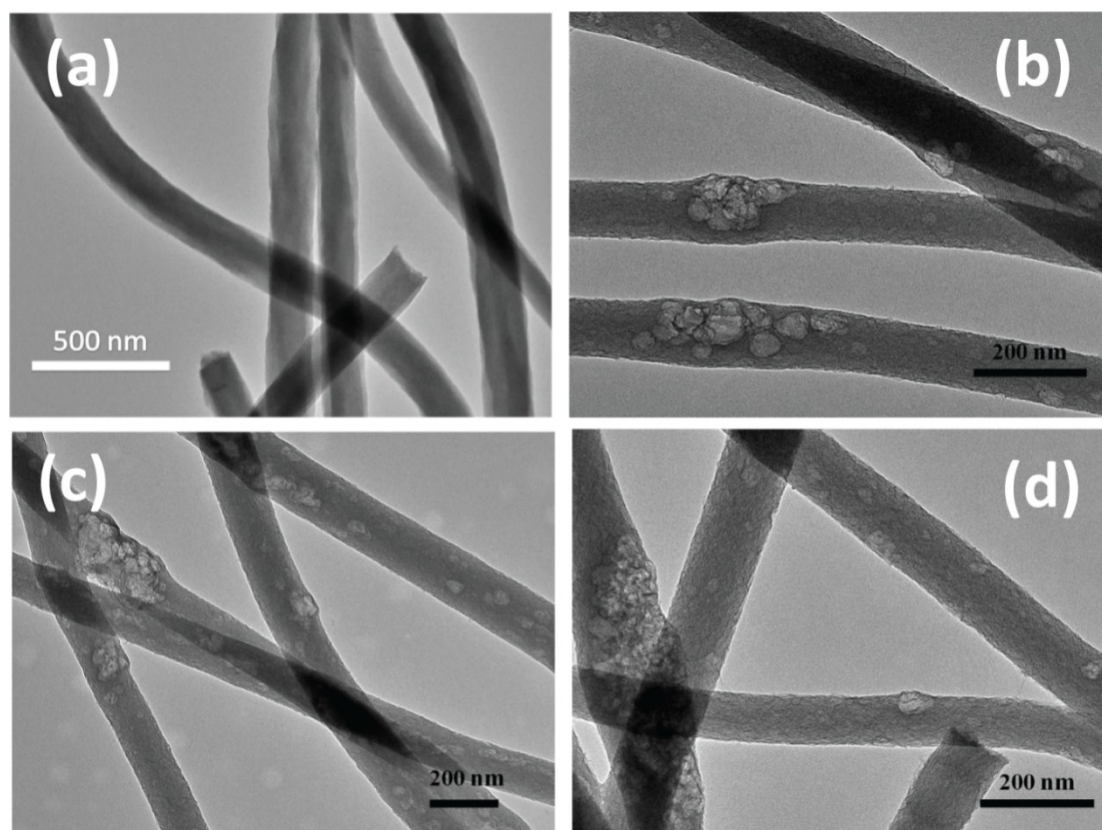

Fig. S2 TEM images of carbon nanofibers with different K<sub>2</sub>S contents: (a) 0 wt% (pure carbon nanofibers), (b) 10 wt%, (c) 20 wt% and (d) 30 wt%.

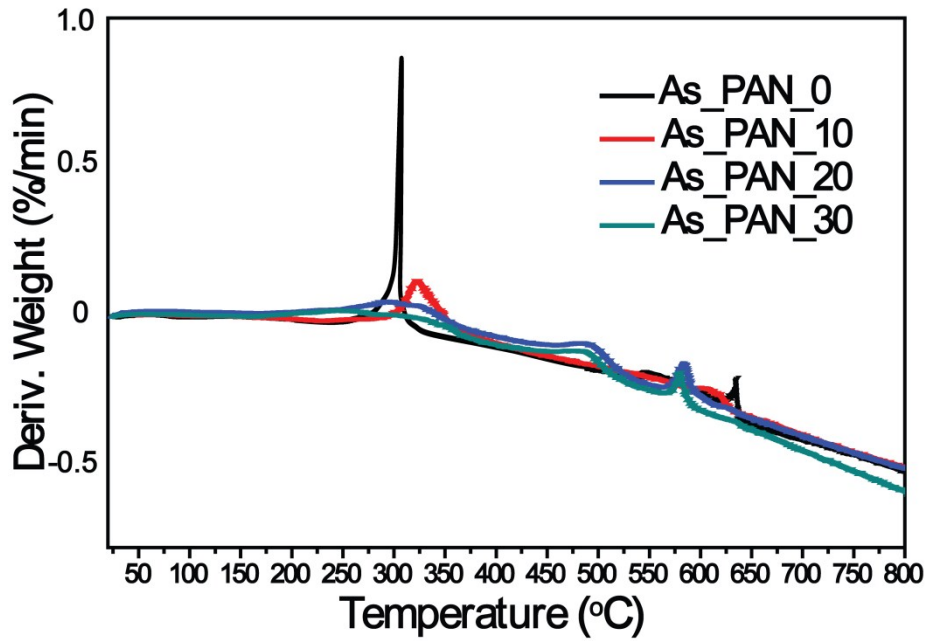

Fig. S3 DTG thermograms of as-prepared  $K_2S/PAN$  composite nanofibers with different  $K_2S$  contents.

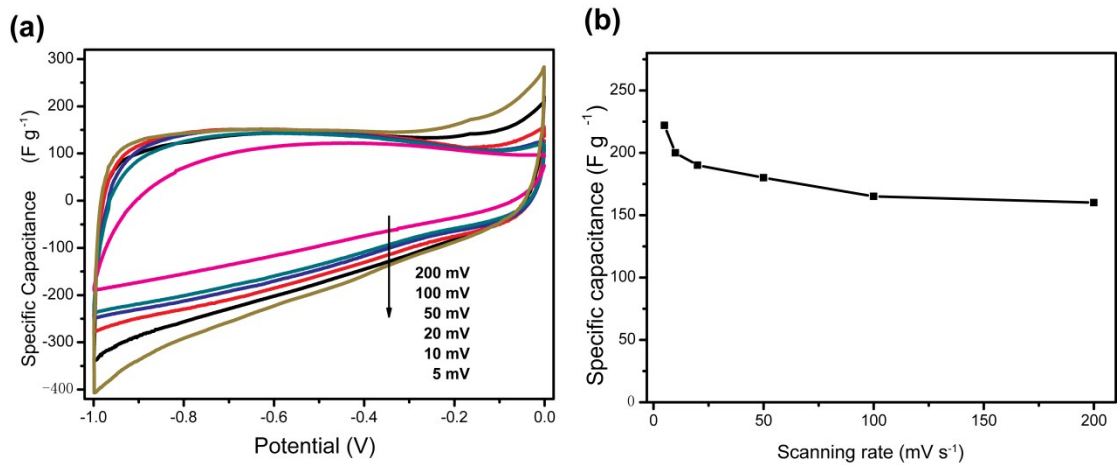

Fig. S4 CV curves (a) and the calculated specific capacitances at the scanning rate range of 5-200  $mV s^{-1}$  in the three electrode system.

Table S1 Comparison of energy density and power density of Car[900]\_CNF\_30 for supercapacitors in the literature.

| Materials           | Electrolyte                        | Current density<br>(A g <sup>-1</sup> ) | Energy density<br>(Wh kg <sup>-1</sup> ) | Power density<br>(kW kg <sup>-1</sup> ) | References |
|---------------------|------------------------------------|-----------------------------------------|------------------------------------------|-----------------------------------------|------------|
| Car[900]_C<br>NF_30 | 6 M NaOH                           | 1                                       | 24.3                                     | 10.4                                    | This work  |
| hCNC                | 6 M NaOH                           | 1                                       | 10.9                                     | 22.22                                   | 1          |
| PNCNs               | 1 M H <sub>2</sub> SO <sub>4</sub> | 0.1                                     | 17.7                                     | 1.1                                     | 2          |
| N-CNFs-<br>900      | 6 M NaOH                           | 0.25                                    | 7.11                                     | 89.57                                   | 3          |
| HP-CNF-10           | 1 M H <sub>2</sub> SO <sub>4</sub> | 30                                      | 3.25                                     | 25.0                                    | 4          |
| HPCNFs-N            | 2 M H <sub>2</sub> SO <sub>4</sub> | 1                                       | 10.96                                    | 25                                      | 5          |

## References

1. J. Zhao, H. W. Lai, Z. Y. Lyu, Y. F. Jiang, K. Xie, X. Z. Wang, Q. Wu, L. J. Yang, Z. Jin, Y. W. Ma, J. Liu and Z. Hu, *Advanced Materials*, 2015, **27**, 3541-3545.
2. Y. Y. Wang, B. H. Hou, H. Y. Lu, C. L. Lu and X. L. Wu, *Chemistryselect*, 2016, **1**, 1441-1446.
3. L.-F. Chen, X.-D. Zhang, H.-W. Liang, M. Kong, Q.-F. Guan, P. Chen, Z.-Y. Wu and S.-H. Yu, *ACS Nano*, 2012, **6**, 7092-7102.
4. R. Zhang, L. Wang, J. Zhao and S. W. Guo, *Acs Sustainable Chemistry & Engineering*, 2019, **7**, 632-640.
5. L. F. Chen, Y. Lu, L. Yu and X. W. Lou, *Energy & Environmental Science*, 2017, **10**, 1777-1783.
